# Supplementary material
Source: publisher figshare collection journal article supplement (https://karger.figshare.com/ndownloader/files/13003967)
Supplement: Supplementary file 1 [file 13003967]

**Supplemental Table S1. Total heme oxygenase (HO) enzyme activity in untreated pups**

| **Day of Life** | **4** | **5** | **6** | **Combined** |
| --- | --- | --- | --- | --- |
| **n** | 4 | 4 | 4 | 12 |
| **HO Activity** | 262.1 ± 17.1 | 241.5 ± 21.4 | 257.5 ± 28.1 | 253.7 ± 22.5 |

Data are shown as mean ± SD pmol CO/h/mg fresh weight

No significant differences were found between all ages, and hence all values were combined and used as control values for calculations of fold change for all treatment groups.
